# Supplementary material for: The coloring problem in Ba2Cu3VS6 †
Source: Royal Society of Chemistry journal article supplement (doi:10.1039/a909517i), 2000-01-01
Supplement: a909517i.doc [file a909517i.doc]

**structure a**

CELL

8.79862 8.87475 10.65848 89.33110 125.94168 60.04690

BA -0.37593 0.15416 -0.56202

V -1.00121 0.64854 -0.75031

CU -1.02059 0.68060 -1.01000

S -0.23316 0.33295 -0.24650

S -0.77467 0.38138 -0.02157

S -0.25280 0.32206 -0.74888

CU -0.99763 0.33658 -0.74845

BA -1.62487 0.77875 -0.93904

CU -0.98076 0.66057 -0.49163

S 0.23141 0.10215 -0.25416

S -1.22649 0.60735 -0.47917

S 0.25112 0.06954 -0.75280

BA -1.62429 1.84582 -0.43822

V -0.99871 0.35118 -0.24958

CU -0.97912 0.31946 0.00988

S 0.23377 0.66672 -0.75301

S -1.22546 0.61880 -0.97849

S 0.25292 0.67778 -0.25137

CU -1.00251 0.66363 -0.25167

BA -0.37504 1.22095 -0.06090

CU -1.01951 0.33983 -0.50824

S -0.23172 0.89796 -0.74620

S -0.77340 0.39267 -0.52068

S -0.25134 0.93058 -0.24700

**structure b**

CELL

8.79111 8.91163 10.72624 89.92278 125.74267 60.00165

BA -0.36619 0.20431 -0.56037

CU -1.00036 0.66613 -0.75005

CU -0.98206 0.66271 -0.99796

S -0.22463 0.30722 -0.23816

S -0.77508 0.37059 -0.02185

S -0.24205 0.34577 -0.75503

V -0.99987 0.36086 -0.75000

BA -1.63392 0.83829 -0.93992

CU -1.01803 0.68077 -0.50203

S 0.22288 0.08369 -0.26260

S -1.22282 0.59355 -0.47688

S 0.24099 0.10465 -0.74549

BA -1.64232 1.78902 -0.44392

V -1.00034 0.33864 -0.25052

CU -1.01519 0.34724 -0.00393

S 0.24163 0.69060 -0.76215

S -1.22613 0.61340 -0.97836

S 0.26400 0.64763 -0.24238

CU -1.00019 0.64649 -0.25021

BA -0.35750 1.14644 -0.05590

CU -0.98510 0.33197 -0.49605

S -0.24078 0.93151 -0.73747

S -0.77317 0.38761 -0.52126

S -0.26378 0.91090 -0.25749

**structure c**

CELL

8.78836 8.92546 10.73512 90.00168 125.97034 59.70648

BA -0.36083 0.21506 -0.55400

CU -0.99652 0.66307 -0.74921

CU -0.97880 0.65620 -0.99451

S -0.23927 0.30567 -0.23775

S -0.75401 0.37002 -0.00588

S -0.24270 0.34700 -0.75720

V -1.00780 0.36306 -0.75533

BA -1.64756 0.85495 -0.94795

V -1.01412 0.66214 -0.50002

S 0.23671 0.06557 -0.26409

S -1.22883 0.61887 -0.49245

S 0.24099 0.10764 -0.74212

BA -1.63226 1.78662 -0.44079

CU -0.99892 0.33084 -0.24877

CU -1.02123 0.34722 -0.00560

S 0.23681 0.69779 -0.76111

S -1.22958 0.61309 -0.98005

S 0.23702 0.65462 -0.25874

CU -0.99984 0.63920 -0.25039

BA -0.36084 1.14660 -0.05969

CU -0.97738 0.32737 -0.49232

S -0.22967 0.92486 -0.72829

S -0.77178 0.39270 -0.51372

S -0.25959 0.90984 -0.26000

**structure d**

CELL

8.81633 8.91194 10.73527 89.04317 125.18004 59.01277

BA -0.36582 0.20582 -0.55453

BA -1.64765 0.84970 -0.94722

BA -1.62537 1.77541 -0.43691

BA -0.36157 1.15823 -0.06047

CU -1.00365 0.66996 -0.75257

CU -0.96891 0.65150 -0.99093

CU -1.01561 0.67262 -0.50182

CU -1.00117 0.33487 -0.24726

CU -1.01907 0.34802 -0.00866

CU -0.99372 0.64588 -0.24837

S -0.23047 0.29987 -0.23515

S -0.76265 0.37365 -0.00882

S -0.23499 0.34106 -0.74332

S 0.22400 0.08454 -0.27741

S -1.23247 0.60261 -0.49490

S 0.24522 0.10080 -0.74227

S 0.23314 0.69650 -0.76302

S -1.23101 0.61597 -0.98035

S 0.25657 0.65306 -0.24707

S -0.24473 0.93577 -0.74114

S -0.77007 0.38403 -0.51282

S -0.26200 0.89905 -0.25738

V -0.99497 0.35635 -0.74891

V -0.99302 0.34472 -0.49873

**structure e**

CELL

8.79696 8.89508 10.70595 90.29646 125.06708 60.42968

BA -0.34033 0.18956 -0.53642

V -1.00010 0.66168 -0.75024

CU -0.99406 0.65768 -1.00647

S -0.23727 0.31127 -0.23689

S -0.75844 0.37249 -0.00816

S -0.24693 0.34917 -0.75487

V -0.99976 0.35345 -0.75036

BA -1.66023 0.84941 -0.96373

CU -1.00566 0.66422 -0.49318

S 0.23495 0.07524 -0.26371

S -1.24045 0.61271 -0.49155

S 0.24601 0.10333 -0.74524

BA -1.59332 1.78171 -0.41111

CU -0.99961 0.33660 -0.24940

CU -1.00470 0.34146 -0.00554

S 0.22725 0.68293 -0.76046

S -1.22000 0.61859 -0.97455

S 0.26273 0.64892 -0.24096

CU -0.99981 0.64550 -0.24895

BA -0.40663 1.18740 -0.08948

CU -0.99545 0.33708 -0.49461

S -0.22619 0.90881 -0.73941

S -0.78030 0.39896 -0.52578

S -0.26171 0.91183 -0.25893
